# Supplementary material
Source: HighWire-hosted journal article supplement (http://www.ajnr.org/highwire/filestream/58264/field_highwire_adjunct_files/0/17-00831.pdf)
Supplement: 17-00831.pdf [file 17-00831.pdf]

**On-line Table: Number of bifurcation aneurysm cases in growing and stable aneurysm groups**

|       | Growing (n = 23)          |                        | Stable (n = 70)           |                        |
|-------|---------------------------|------------------------|---------------------------|------------------------|
|       | Bifurcation Aneurysms (%) | Total No. of Aneurysms | Bifurcation Aneurysms (%) | Total No. of Aneurysms |
| ACA   | 1 (25)                    | 4                      | 3 (19)                    | 16                     |
| ICA   | 1 (13)                    | 8                      | 3 (8)                     | 38                     |
| PcomA | 1 (11)                    | 9                      | 0 (0)                     | 4                      |
| MCA   | 1 (100)                   | 1                      | 6 (75)                    | 8                      |
| BA/VA | 0 (0)                     | 1                      | 0 (0)                     | 4                      |
| Total | 4 (17)                    | 23                     | 12 (17)                   | 70                     |
